# Supplementary material for: Increasing the Magnesium Concentration in Various Dialysate Solutions Differentially Modulates Oxidative Stress in a Human Monocyte Cell Line
Source: PubMed Central journal article supplement (PMC7222382; doi:10.3390/antiox9040319), 2020-04-15
Supplement: antioxidants-09-00319-s001.pdf [file antioxidants-09-00319-s001.pdf]

1 Article

# 2 Increasing the Magnesium Concentration in Various 3 Dialysate Solutions Differentially Modulates 4 Oxidative Stress in a Human Monocyte Cell Line

5 Carmen Vida <sup>1</sup>, Julia Carracedo <sup>2,3,\*</sup>, Patricia de Sequera <sup>4,5</sup>, Guillermo Bodega <sup>6</sup>, Rafael Pérez <sup>4</sup>,  
6 Matilde Alique <sup>1,7,\*†</sup> and Rafael Ramírez <sup>1,7,†</sup>

7 <sup>1</sup> Dpto. de Biología de Sistemas, Universidad de Alcalá, 28871 Alcalá de Henares, Madrid, Spain;  
8 carmen.vida@uah.es (C.A.); manuel.ramirez@uah.es (R.R.)

9 <sup>2</sup> Dpto. Genética, Fisiología y Microbiología (Sección Fisiología), Universidad Complutense de Madrid,  
10 28040 Madrid, Spain

11 <sup>3</sup> Instituto de Investigación Sanitaria Hospital 12 de Octubre (imas12), 28041 Madrid, Spain

12 <sup>4</sup> Sección de Nefrología, Hospital Universitario Infanta Leonor, 28031 Madrid, Spain;  
13 patricia.desequera@salud.madrid.org (P.d.S.); rperezgarcia@senefro.org (R.P.)

14 <sup>5</sup> Dpto. de Medicina, Universidad Complutense de Madrid, 2804 Madrid, Spain

15 <sup>6</sup> Dpto. de Biomedicina y Biotecnología, Universidad de Alcalá, Alcalá de Henares, 28805 Madrid, Spain;  
16 guillermo.bodega@uah.es

17 <sup>7</sup> Instituto Ramón y Cajal de Investigación Sanitaria, (IRYCIS), 28034 Madrid, Spain

18 \* Correspondence: julcar01@ucm.es (J.C.); matilde.aliq@uah.es (M.A.)

19 † These authors share senior authorship

20 Received: 27 February 2020; Accepted: 14 April 2020; Published: date

21 **Supplementary Materials:** The following are available online at [www.mdpi.com/xxx/s1](http://www.mdpi.com/xxx/s1), supplementary figures:  
22 Figure S1; Figure S2; Figure S3.

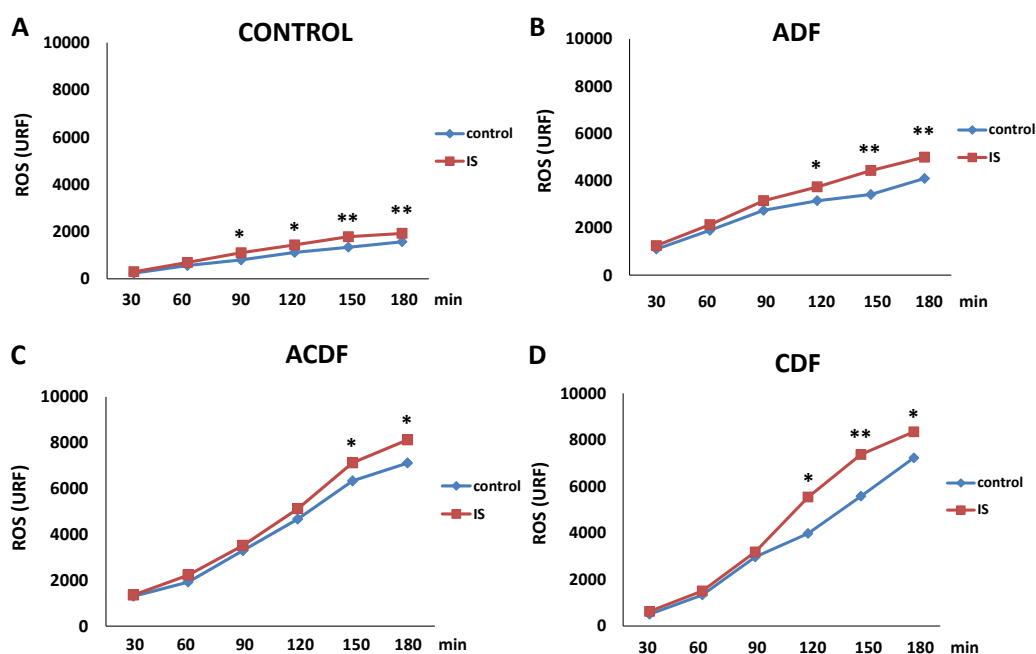

23

24

25

26

27

28

**Figure S1.** Intracellular reactive oxygen species (ROS) production under basal conditions (control) and in response to indoxyl sulfate (IS; 256 µg/mL) in human THP-1 monocytes cultured in a control solution ((A) Hank's medium) or various dialysis fluids ((B) ADF (acetate 3 mM), (C) ACDF (citrate 0.3 mM + acetate 0.8 mM), and (D) CDF (citrate 1 mM)). Each point represents the mean ± standard deviation (SD) of 8–10 independent experiments. ROS were measured at different times (30, 60, 90,

29 120, 150, and 180 min), and each value is the mean of duplicate assays. \*  $p < 0.05$  and \*\*  $p < 0.01$  vs. the  
 30 value in the basal conditions.

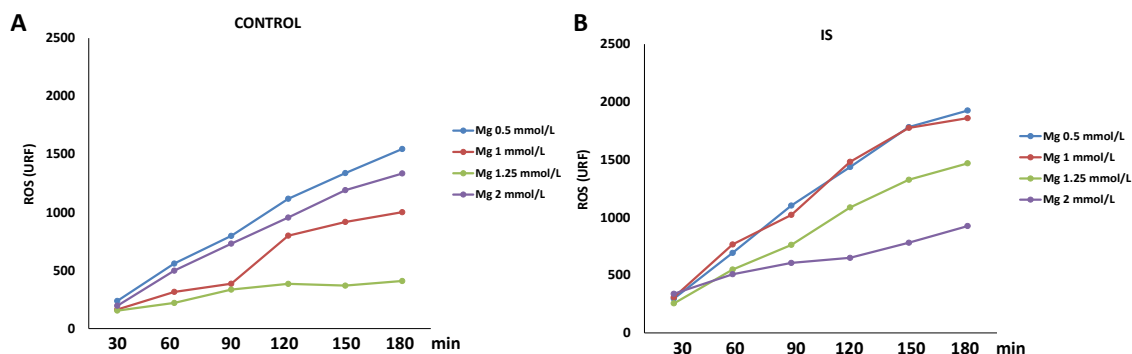

31  
 32 **Figure S2.** Intracellular reactive oxygen species (ROS) production in (A) basal conditions (control)  
 33 and (B) in response of indoxyl sulfate (IS; 256  $\mu\text{g}/\text{mL}$ ) in human THP-1 monocytes cultured in Hank's  
 34 medium (control solution) with standard Mg (0.5 mM, control) or with high Mg concentrations (1,  
 35 1.25, and 2 mM). Each point represents the mean  $\pm$  SD of 8–10 independent experiments. ROS were  
 36 measured at different times (30, 60, 90, 120, 150, and 180 min), and each value is the mean of duplicate  
 37 assays.

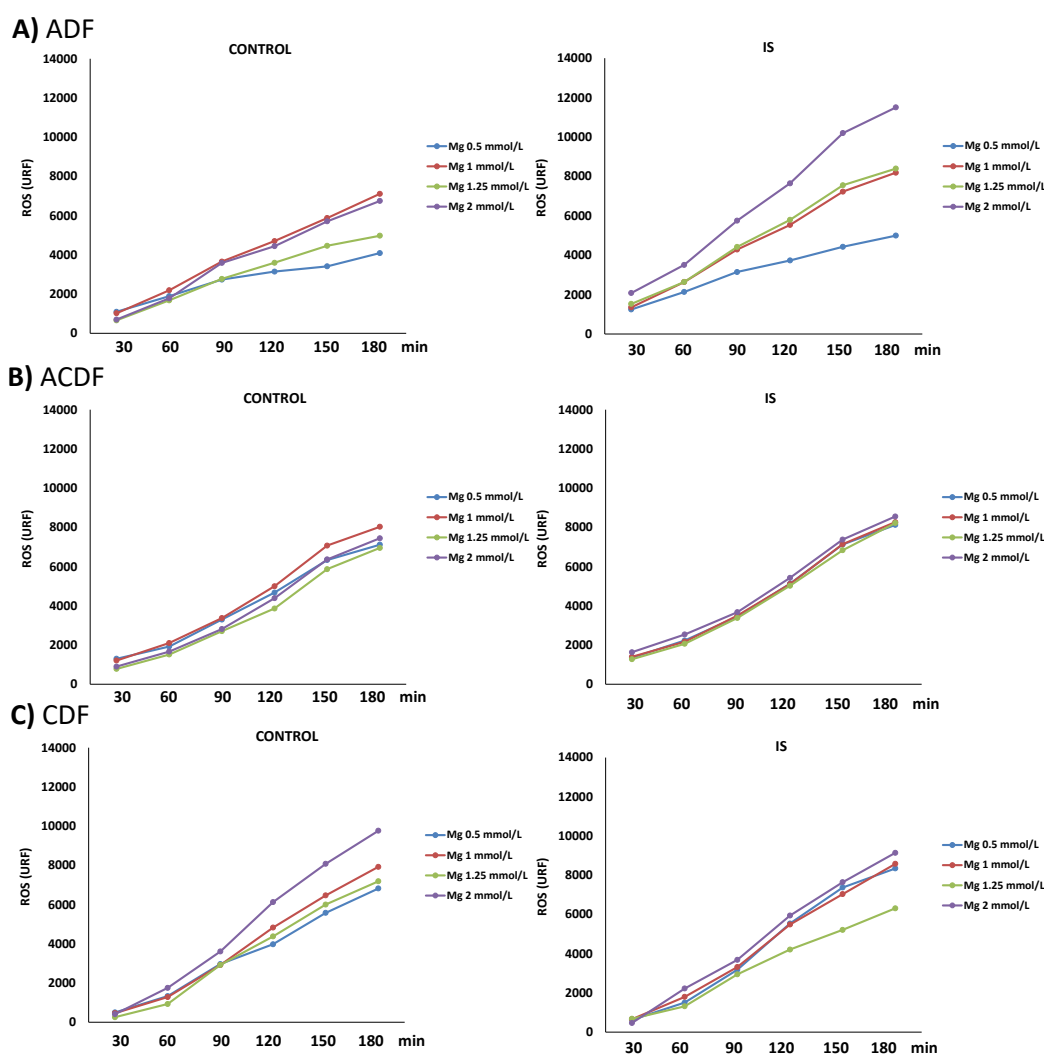

38  
 39 **Figure S3.** Intracellular reactive oxygen species (ROS) production under basal conditions (control)  
 40 and in response of indoxyl sulfate (IS; 256  $\mu\text{g}/\text{mL}$ ) in human THP-1 monocytes cultured in (A) ADF

41 (acetate 3 mM), (B) ACDF (citrate 0.3 mM + acetate 0.8 mM), and (C) CDF (citrate 1 mM) dialysates  
42 with standard Mg (0.5 mM, control) or with high Mg concentrations (1, 1.25, and 2 mM). Each point  
43 represents the mean  $\pm$  SD of 8–10 independent experiments. ROS were measured at different times  
44 (30, 60, 90, 120, 150, and 180 min), and each value is the mean of duplicate assays.

45

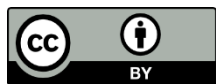

© 2020 by the authors. Submitted for possible open access publication under the terms and conditions of the Creative Commons Attribution (CC BY) license (<http://creativecommons.org/licenses/by/4.0/>).

46
